# Supplementary material
Source: PubMed Central journal article supplement (PMC3355543)
Supplement: supp_me.2011-1253_11-1253_supp_files.pdf [file supp_me.2011-1253_11-1253_supp_files.pdf]

**Supplementary materials**

Supplementary Figures 1-8  
Supplementary Tables 1-3  
Supplementary Methods  
Supplementary References

**Supplementary Fig. 1** Model of direct PPAR $\gamma$  action in skeletal muscle, *in vivo*. **A-C** PPAR mRNA (**A**), protein (**B**), and activity (**C**): Tibialis anterior of C57Bl/6J mice was injected with 15  $\mu$ g pSV-PPAR $\gamma$ 1 on one side, 15  $\mu$ g pCMV- $\beta$ gal on the contralateral side, and 5  $\mu$ g pRL-TK plus 5  $\mu$ g pPPREx3-LUC on both sides. PPAR activity was calculated as the ratio of firefly to Renilla luciferase activities, measured one week after transfection (\*  $p < 0.05$ ,  $n = 6$ ; \*\*\*  $p < 0.00005$ ,  $n = 8$ ). The PPAR $\gamma$  protein content of brown adipose tissue (BAT) is shown for comparison. **D** Frozen sections from tibialis anterior transfected with 10  $\mu$ g pCMV- $\beta$ gal + 15  $\mu$ g PPAR $\gamma$  on one side or 25  $\mu$ g  $\beta$ -gal (contralateral side). Top panels: X-gal staining. Lower panels: AdipoRed staining.

**Supplementary Fig. 2** Model of direct PPAR $\gamma$  action in skeletal myotubes. **A-C** In C2C12 myotubes, PPAR $\gamma$  mRNA (**A**), protein (**B**), and activity (**C**) were assessed 2 days after adenotransfection and 1 day after 500 nM rosiglitazone (Rosi) treatment. \*  $p < 0.05$  versus adGFP transfected groups, \*\*  $p < 0.01$  versus all other experimental groups,  $n = 3-4$  per group. **D** PPAR $\gamma$ -activating ligand levels were assessed by measurement of secreted alkaline phosphatase (SEAP) accumulation in the media of myotubes transfected with a PPAR $\gamma$  ligand binding domain (LBD) based reporter construct. Myoblasts had been transfected with pFA-PPAR $\gamma$ -LBD and pFR-SEAP (see Supplementary Methods). #  $p < 0.0001$  versus vehicle treated cells. **E** Myotube morphology assessed by phase-contrast microscopy using a 10x objective; white bars represent 200  $\mu$ m. Undifferentiated C2C12 myoblasts are shown for comparison. **F** Transcriptional markers of myocellular differentiation, myogenin (Myog) and myosin heavy chain 1 (Myh1), in C2C12 myotubes treated as indicated, with 3T3L1 fibroblasts and C2C12 myoblasts serving for comparison. Not detected, N.D. **G** Expression of other transcriptional markers. Cysteine-rich secretory protein 1 (CRISP1) is an adipose-selective gene which is not responsive to thiazolidinediones. Ancient ubiquitous protein 1 (AUP1) is a gene highly regulated by thiazolidinediones in mature adipocytes but with similar expression between muscle and adipose tissue. See Supplementary Methods for methods by which these markers were selected. In contrast to myoblast models of PPAR $\gamma$  action (Supplemental References 1-3), transdifferentiation to adipocytes is not observed in our models, presumably avoided by transfecting PPAR $\gamma$  into differentiated myocytes.

**Supplementary Fig. 3** **A** AdipoRed (green) staining of neutral lipid droplets in myotubes cultured with media containing no added fatty acid (top panels) or 0.75 mM oleate + 0.3 mM albumin (bottom panels). Nuclei are stained blue with DAPI. **B** PPAR $\gamma$  overexpression increases myocellular triglyceride levels only when the media is supplemented with fatty acid. Total triglyceride levels were measured in myotubes incubated for 18 h with media with no added fatty acid (left group) or 0.75 mM oleate + 0.3 mM albumin (right group). C2C12 myotubes were treated with adGFP + vehicle (white bars), adGFP + 500 nM rosiglitazone (hatched), adPPAR $\gamma$  + vehicle (grey), or adPPAR $\gamma$  + 500 nM rosiglitazone (black).  $n = 3$ , \* $p < 0.05$  versus adGFP, # $p < 0.05$  versus adGFP + rosiglitazone. **C** Oxidation by myotubes of 80  $\mu$ M [ $1-^{14}$ C]oleate complexed with 40  $\mu$ M albumin over 2 h to acid soluble metabolites (partial oxidation, black bars, left axis) and  $^{14}$ CO $_2$  (grey bars, right axis). +DNP cells were pre-incubated with 200  $\mu$ M 2,4-dinitrophenol (DNP) for 30 minutes prior to measurement of oxidation.

**Supplementary Fig. 4** Rosiglitazone dose response for insulin-stimulated AKT phosphorylation. **A** Myotubes were treated with rosiglitazone for 24 h, then 10 nM insulin for 10 min. Grey lines represent non-linear fits for  $EC_{50} = 5$  nM. Top panel: adGFP transfected cells,  $n = 2-5$  per point. Bottom panel: adPPAR $\gamma$  transfected cells,  $n = 2-3$  per point. **B** Representative blots from adPPAR $\gamma$  transfected cells.

**Supplementary Fig. 5** Influence of direct PPAR $\gamma$  action on insulin sensitivity. **A** Effect of myocyte differentiation on PPAR $\gamma$  action induced insulin sensitization. C2C12 myocytes were studied at the indicated degrees of differentiation. Cells were treated as detailed in Figure 4A, and the resultant lysates blotted for pAKT. **B** PPAR $\gamma$  action rescues lipid-inhibited insulin signaling in FAT knockdown myotubes treated for 18 h with 0.75 mM palmitate and 0.3 mM albumin.

**Supplementary Fig. 6** Influence of direct PPAR $\gamma$  action on insulin sensitivity. **A** Phosphotyrosine content of IRS-1 in C2C12 myotube lysates immunoprecipitated (IP) then immunoblotted (IB) with the indicated antibodies. The lack of effect of palmitate on insulin stimulated IRS-1 tyrosine phosphorylation recapitulates described results (Supplemental Reference 4). **B** PI3-kinase activity in IRS-1 immunoprecipitates from C2C12 myotubes receiving the indicated treatments. **C D** Phosphorylation of glycogen synthase kinase 3 $\beta$  (GSK3 $\beta$ ) and glycogen synthase (GS) in C2C12 myotubes under the indicated conditions. N=3-4, \*p<0.05 versus no insulin, # p<0.05 versus PPAR $\gamma$ /rosiglitazone treated cells. **E** Glycogen synthesis over 30 min in FAT knockdown (shFAT.1 middle panels and shFAT.3 right panels) and control (shGFP, left panels) myotubes treated with 0 (basal, bottom panels, white bars) or 100 nM insulin (bottom panels, black bars). Top panel shows the difference between the insulin-stimulated and basal states (grey bars). n=3, \*p<0.05 for change induced by insulin.

**Supplementary Fig. 7 A** Blood glucose (left panel) and glucose infusion rates (GIR, right panel) in mice infused with 6 mU/kg/min insulin; shown to document achievement of steady state during the final 40 minutes for the experiment shown in Figure 5F. **B** Extra-cellular acidification rates (ECAR) in C2C12 cells that had been exposed to 0.75 mM palmitate for 24 hours prior (red triangles) or not. Two groups received insulin (blue squares and red triangles) when indicated during the measurements. Cells received the indicated additions during the measurements. N=3. **C** mRNA expression in C2C12 myotubes. \*p<0.05 versus PPAR $\gamma$  group, \*\*\* p<0.0005 versus adGFP transfected cells, #### p<0.0005 versus all other groups, n=3.

**Supplementary Fig. 8** Influence of PPAR $\gamma$  action on lipotoxic myocellular lipid clearance and accumulation. **A** Clearance of palmitate-labeled myocellular lipids. Cells were labeled with 0.75 mM 0.5  $\mu$ Ci/mL [9,10-<sup>3</sup>H]palmitate + 0.3 mM albumin over one day as described in Figure 6b. Cell lipid was extracted at 0 h (black lines), at which time [9,10-<sup>3</sup>H]palmitate was replaced by unlabeled palmitate, and at 4 (blue lines) and 8 (red dotted lines) h thereafter. Radioactivity in the extracted lipids was separated by thin layer chromatography, identifying peaks corresponding to phosphatidylinositol (PI), phosphatidylcholine (PC), phosphatidylethanolamine (PE), unesterified palmitate (free), and triglycerides (TG). Myotubes were treated with adGFP and vehicle (top panel) or adPPAR $\gamma$  and 500 nM rosiglitazone (bottom panel); note the expanded y-axis scale in the lower panel. **B** DAPI (blue) and AdipoRed (green) staining of neutral lipid droplets in myotubes cultured with 0.75 mM palmitate + 0.3 mM albumin. **C** Ceramide in myotubes (n=6-8 per group), measured in the same cultures in which diacylglycerol was measured (Figure 6d).

**Supplementary Table 1** Gene names, abbreviations, and NCBI Gene ID

**Supplementary Table 2** PCR primers and conditions.

**Supplementary Table 3** Effect of myocyte differentiation on PPAR $\gamma$  induced fatty acid uptake.

Supplemental Figure 1

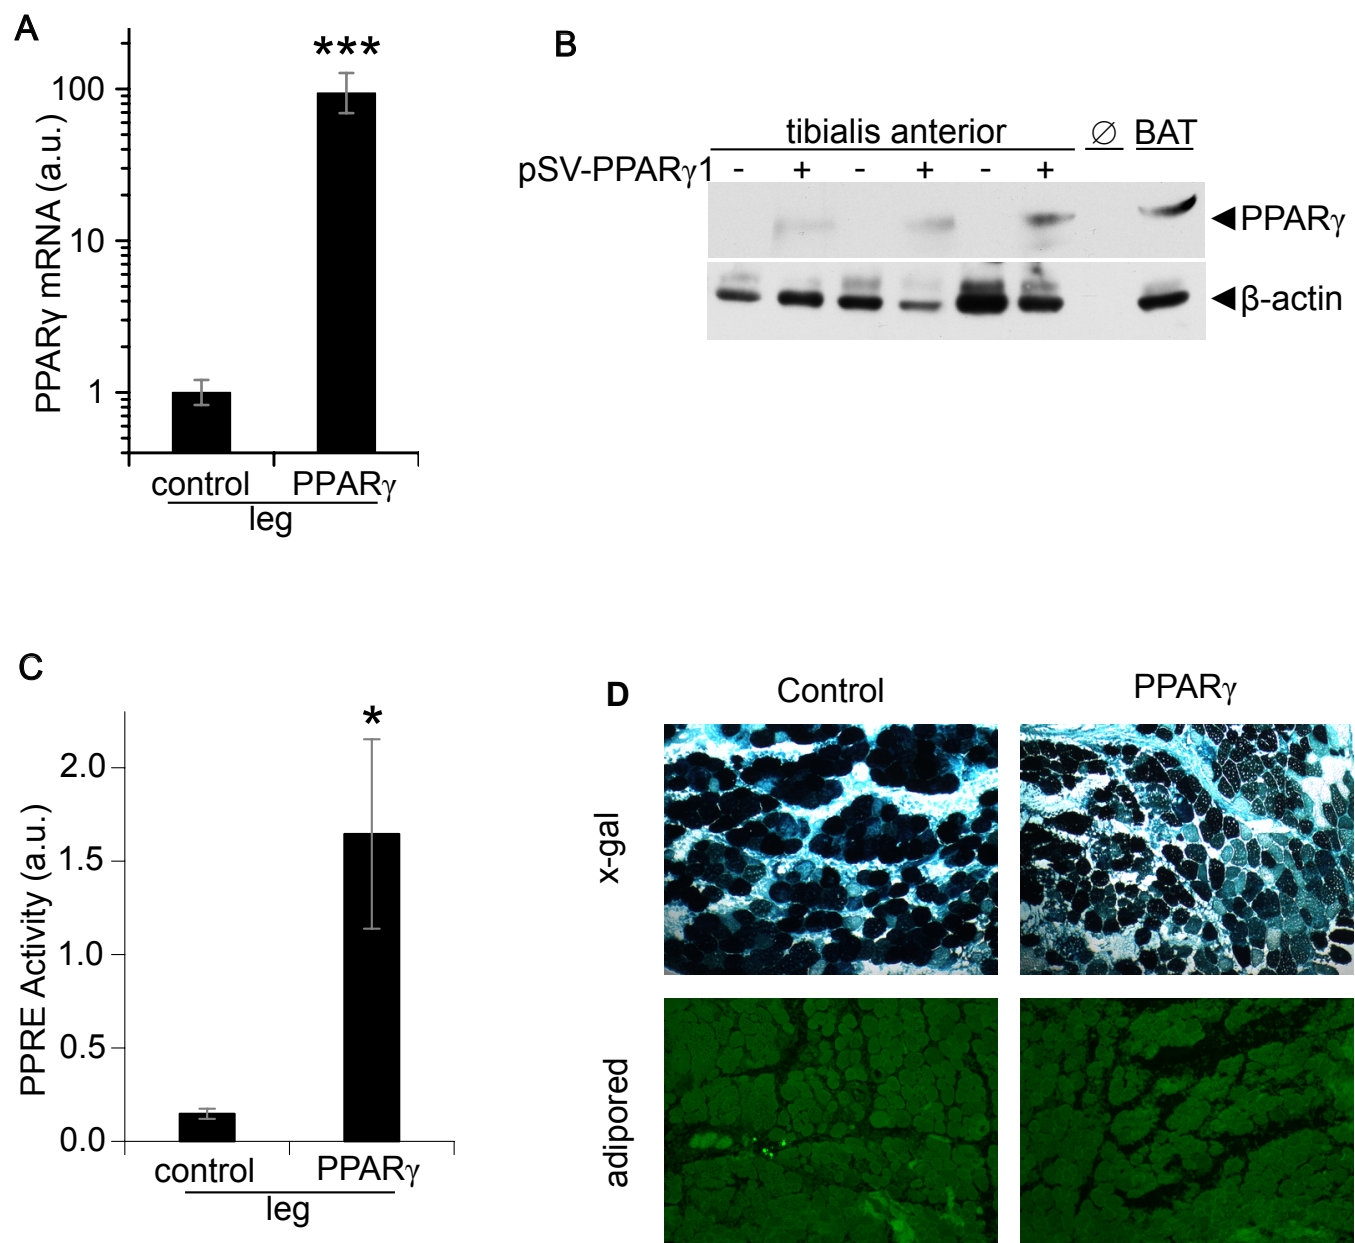

# Supplemental Figure 2

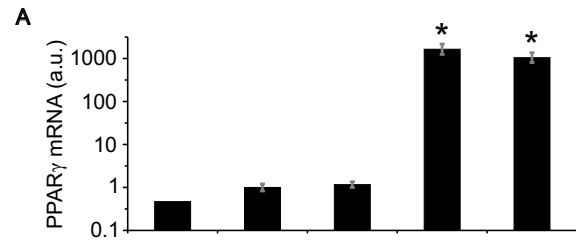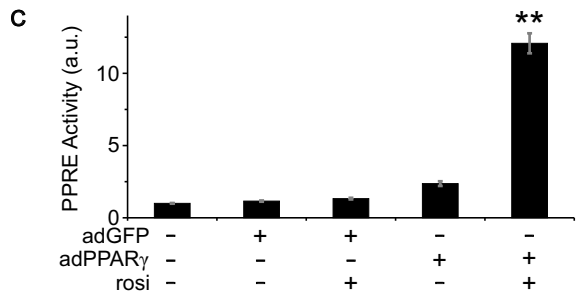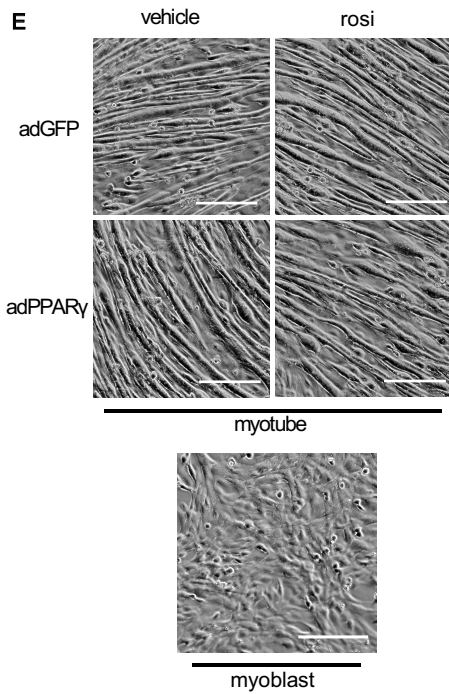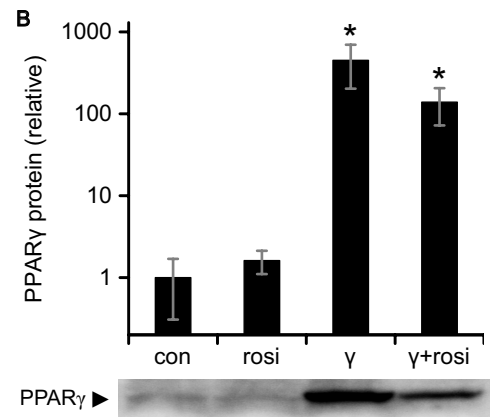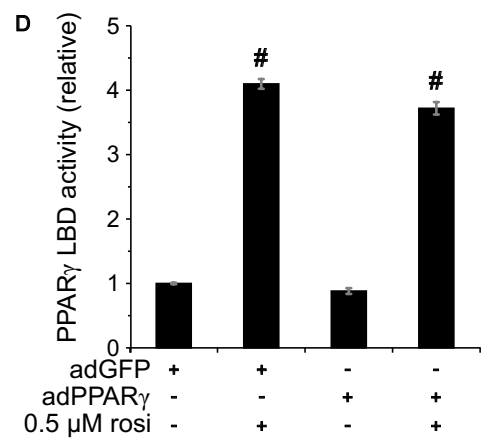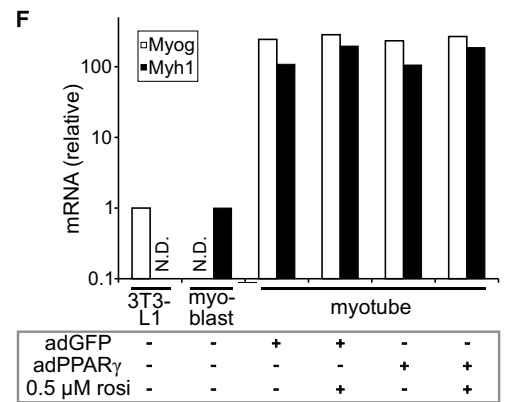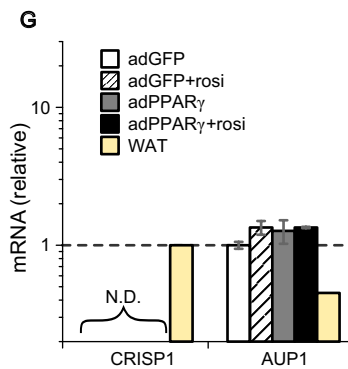

Supplemental Figure 3

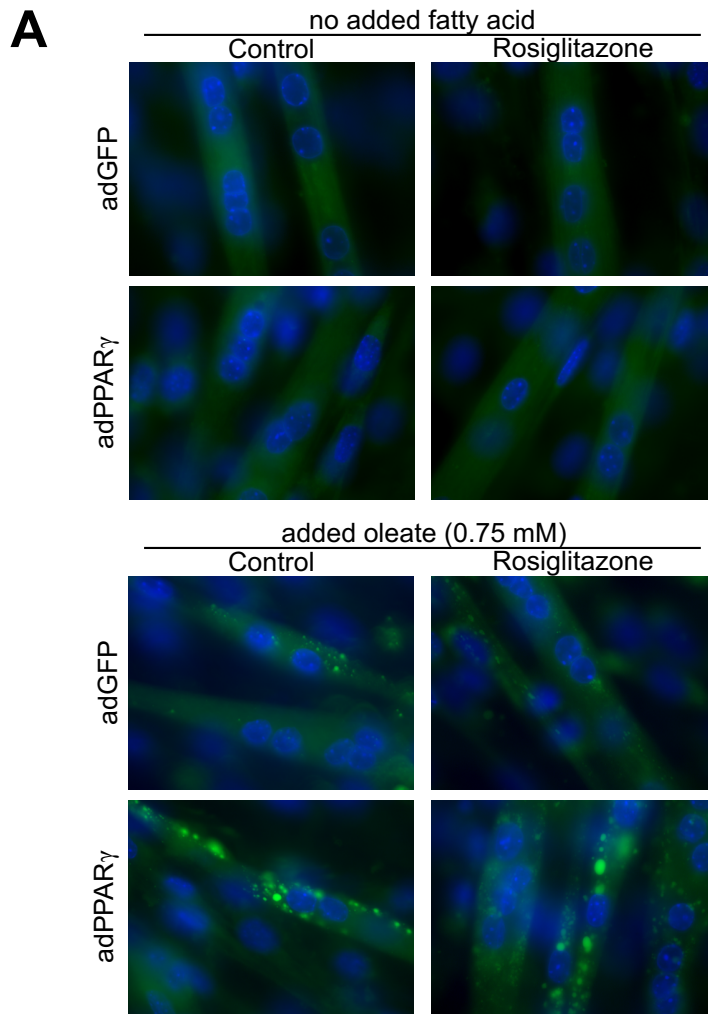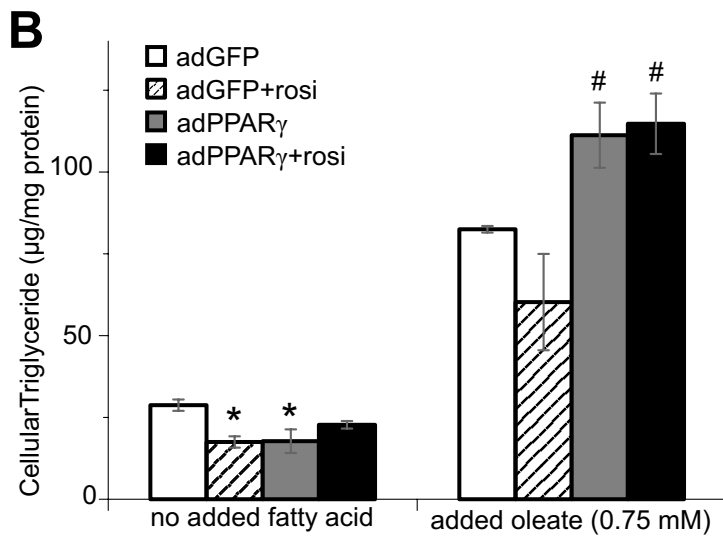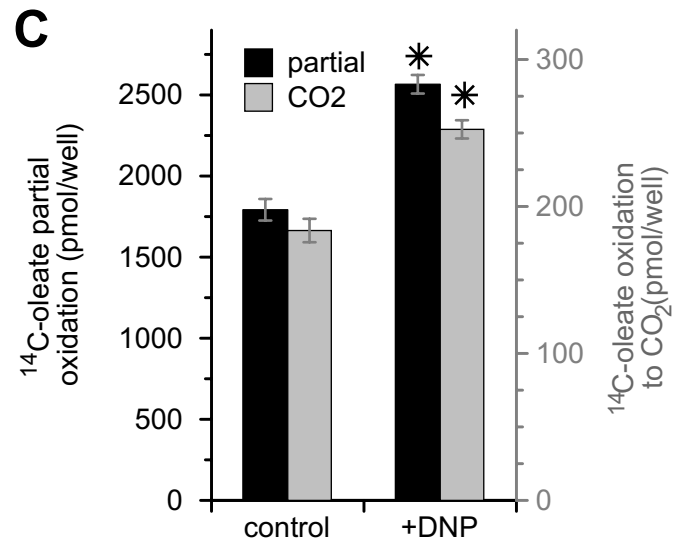

Supplemental Figure 4

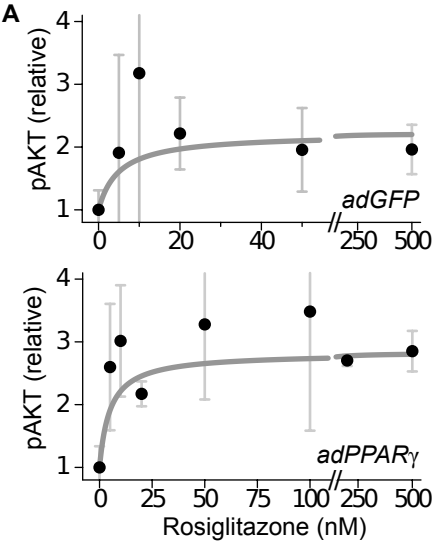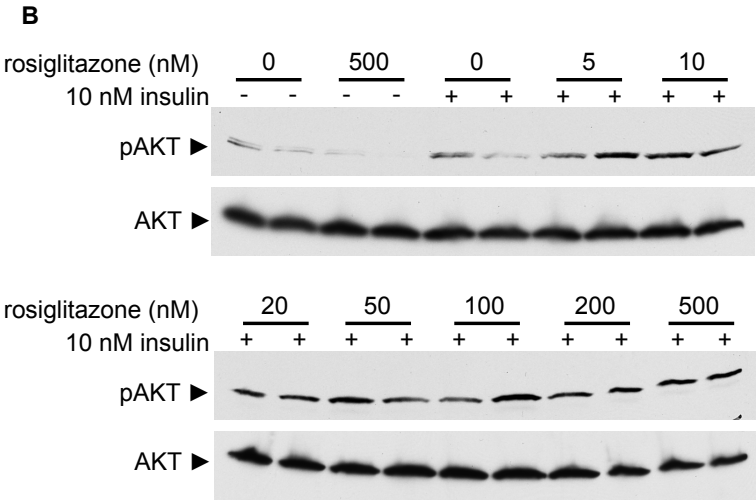

Supplemental Figure 5

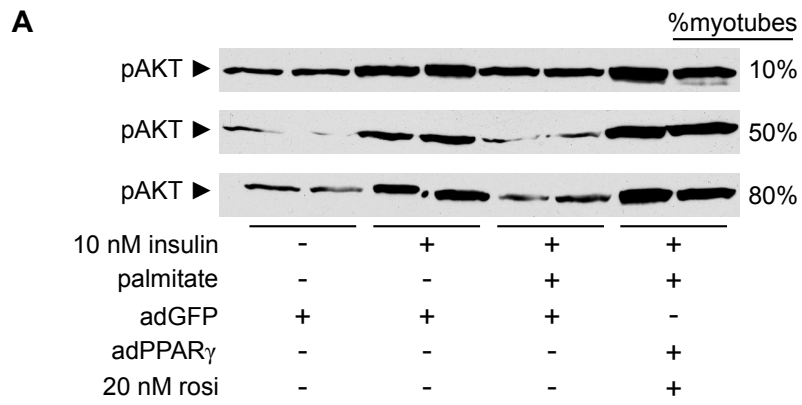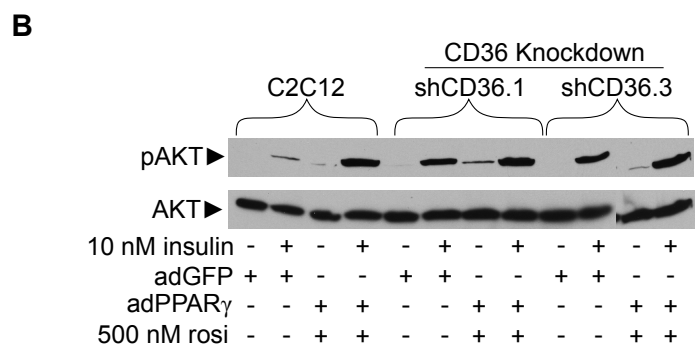

Supplemental Figure 6

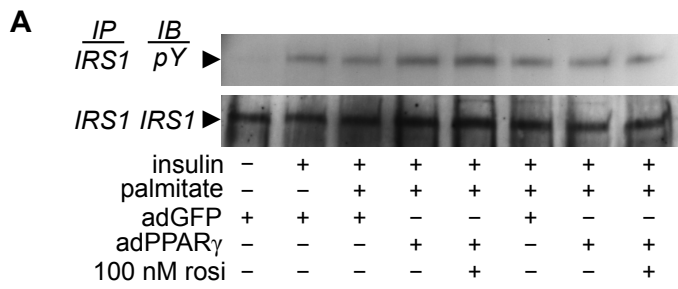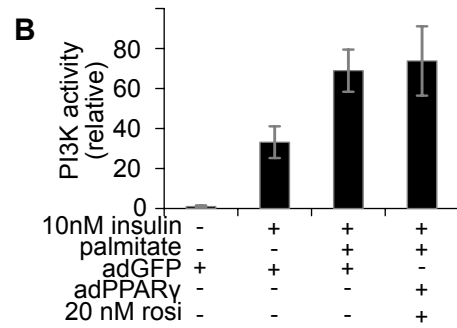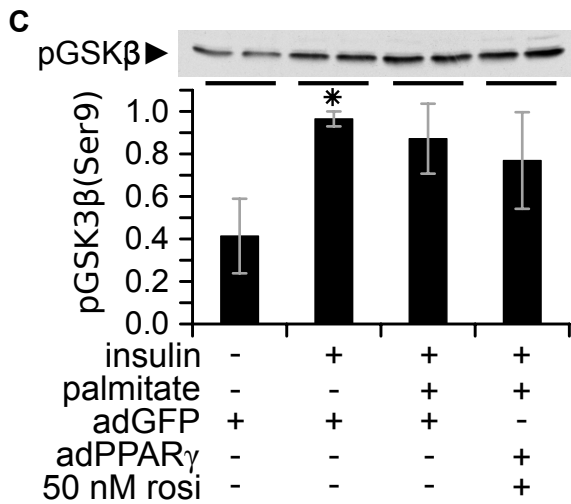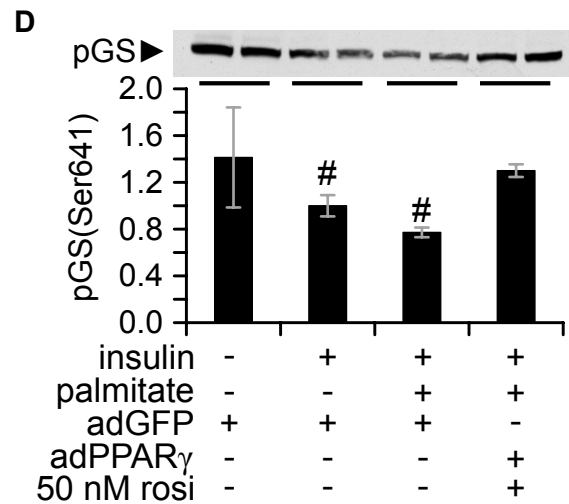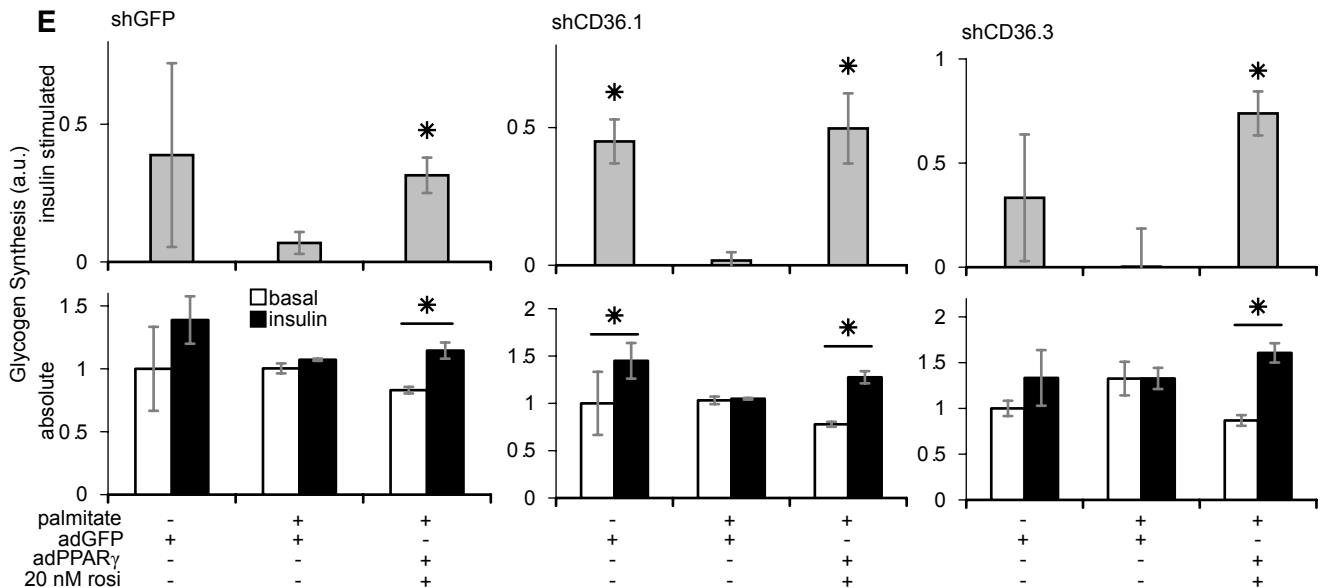



Supplemental Figure 7

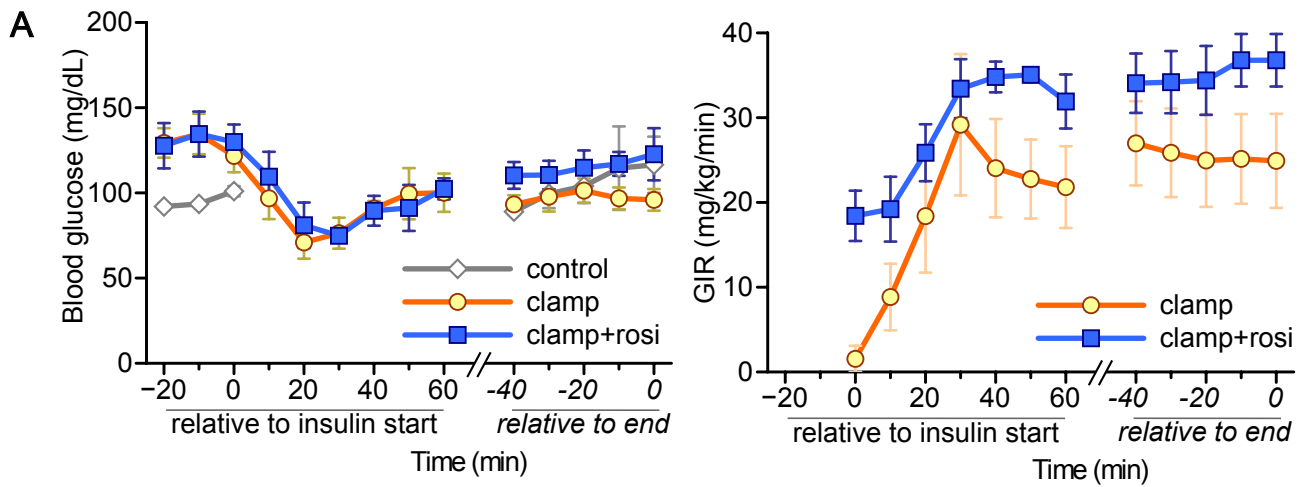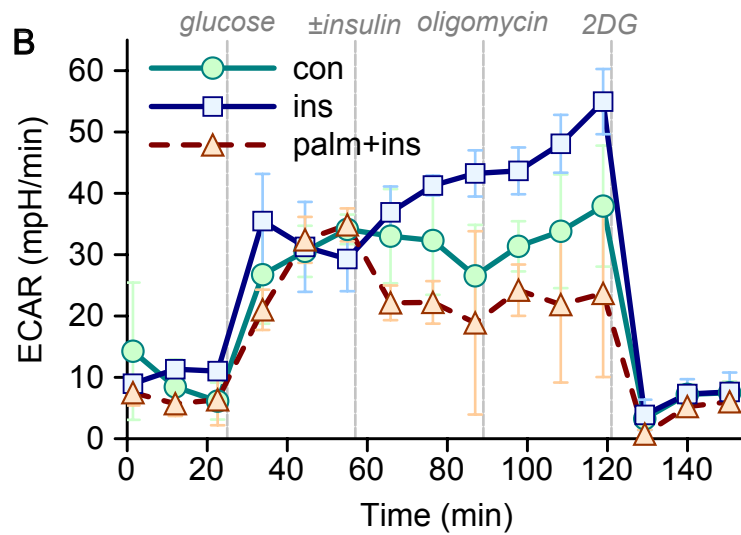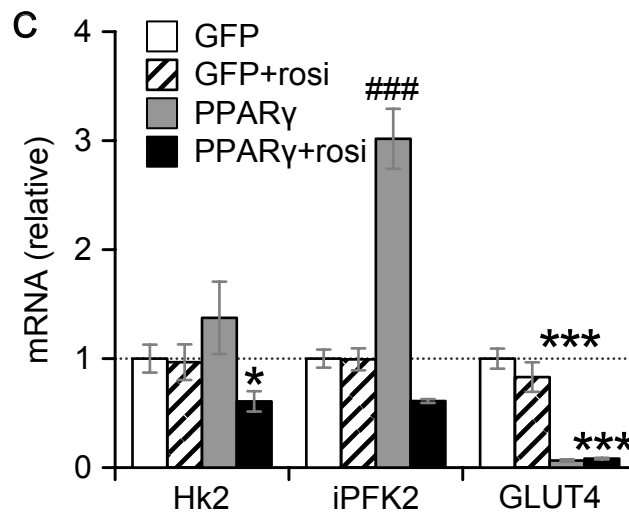

Supplemental Figure 8

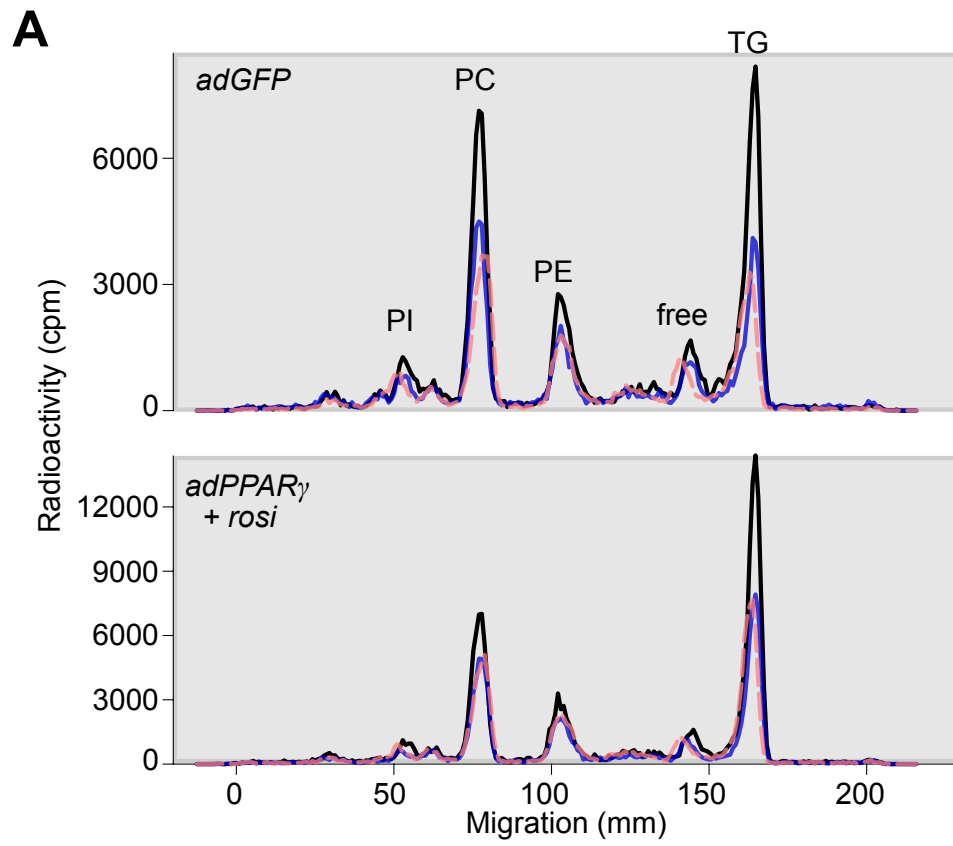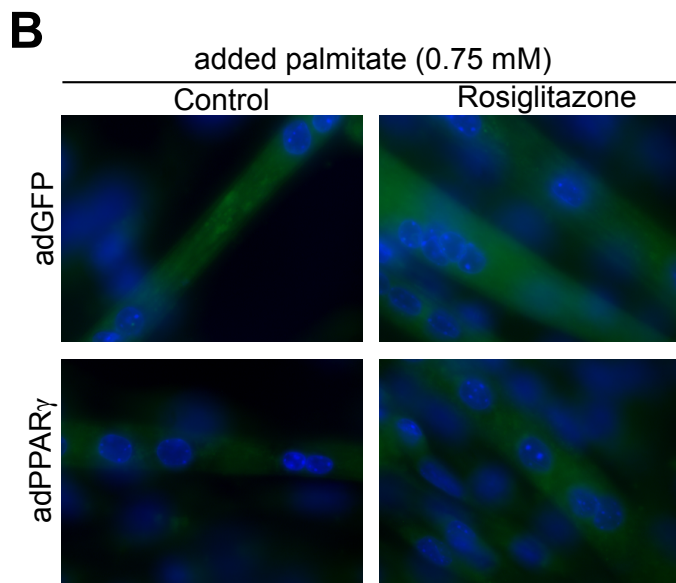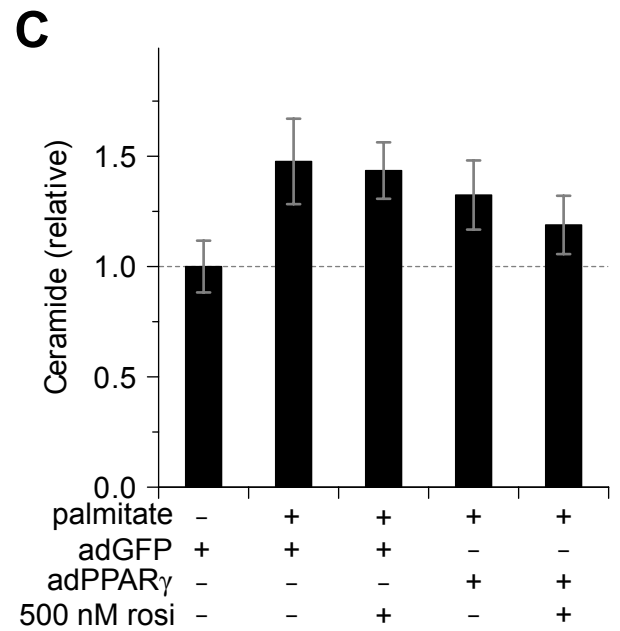

## SUPPLEMENTAL TABLES

**Supplemental Table 1:**

| manuscript    |                                                       | NCBI GENE |                        |
|---------------|-------------------------------------------------------|-----------|------------------------|
| abbrev.       | name                                                  | symbol    | ID                     |
| ACOX1         | acyl-CoA oxidase                                      | Acox1     | <a href="#">11430</a>  |
| Actb          | beta actin                                            | Actb      | <a href="#">11461</a>  |
| AKT           | thymoma viral proto-oncogenes                         | _a        |                        |
| AUP1          | ancient ubiquitous protein 1                          | Aup1      | <a href="#">11993</a>  |
| CPT1B         | muscle-type carnitine palmitoyltransferase I          | Cpt1b     | <a href="#">12895</a>  |
| CRISP1        | cysteine-rich secretory protein 1                     | Crisp1    | <a href="#">11571</a>  |
| CD36          | CD36                                                  | Cd36      | <a href="#">12491</a>  |
| FABPpm        | plasma membrane-associated fatty acid-binding protein | Got2      | <a href="#">25721</a>  |
| FATP1         | fatty acid transport protein 1                        | Slc27a1   | <a href="#">26457</a>  |
| FATP4         | fatty acid transport protein 1                        | Slc27a1   | <a href="#">26569</a>  |
| GLUT4         | glucose transporter type 4                            | Slc2a4    | <a href="#">20528</a>  |
| GSK3 $\beta$  | glycogen synthase kinase 3 beta                       | Gsk3b     | <a href="#">56637</a>  |
| GYS           | glycogen synthase                                     | _a        |                        |
| GYS1          | glycogen synthase 1, muscle                           | Gys1      | <a href="#">14936</a>  |
| Hk2           | hexokinase-2, muscle                                  | Hk2       | <a href="#">15277</a>  |
| iPFK2         | 6-phosphofructo-2-kinase                              | Pfkfb3    | <a href="#">170768</a> |
| IRS1          | insulin receptor substrate 1                          | Irs1      | <a href="#">16367</a>  |
| LCHAD         | long chain hydroxyacyl-CoA dehydrogenase              | Hadha     | <a href="#">97212</a>  |
| MCAD          | medium chain acyl-CoA dehydrogenase                   | Acadm     | <a href="#">11364</a>  |
| Myh1          | myosin heavy chain 1                                  | Myh1      | <a href="#">17879</a>  |
| Myog          | Myogenin                                              | Myog      | <a href="#">17828</a>  |
| p85           | phosphoinositide-3-kinase, p85 regulatory subunits    | _a        |                        |
| PDK1          | 3-phosphoinositide dependent protein kinase 1         | Pdpk1     | <a href="#">18607</a>  |
| PI3K          | phosphoinositide-3-kinase complex                     | _b        |                        |
| PKC $\theta$  | protein kinase C theta                                | Prkce     | <a href="#">18761</a>  |
| PPAR $\gamma$ | peroxisome proliferator activated receptor $\gamma$   | Pparg     | <a href="#">19016</a>  |
| PP2A-r2b      | protein phosphatase 2A, regulatory subunit B beta     | Ppp2r2b   | <a href="#">72930</a>  |
| PP2A-r3a      | protein phosphatase 2A, regulatory subunit B'' alpha  | Ppp2r3a   | <a href="#">235542</a> |
| PYGM          | muscle glycogen phosphorylase                         | Pygm      | <a href="#">19309</a>  |
| Trib3         | tribbles homolog 3                                    | Trib3     | <a href="#">246273</a> |

<sup>a</sup> - more than one isoform from separate genes

<sup>b</sup> - protein complex

**Supplemental Table 2:** PCR primers and conditions.

| Gene           | Protocol | Direction | Primer (5'-3')             |
|----------------|----------|-----------|----------------------------|
| <i>Pparg</i>   | a        | Forward   | ATCAGGCTTCCACTATGGAGTT     |
|                |          | Reverse   | TAAGCTTCAATCGGATGGTTCT     |
| <i>Cd36</i>    | b        | Forward   | CAATGGAAAGGATAACATAAGCA    |
|                |          | Reverse   | GATCCGAACACAGCGTAGATAGA    |
| <i>Actb</i>    | a,b      | Forward   | GAGATTACTGCTCTGGCTCCT      |
|                |          | Reverse   | GGACTCATCGTACTCCTGCTT      |
| <i>Myog</i>    | a        | Forward   | GGCAATGCACTGGAGTTTCG       |
|                |          | Reverse   | AGGCAACAGACATATCCTCCA      |
| <i>Myh1</i>    | a        | Forward   | TCGATGACCTCGCTAGTAACA      |
|                |          | Reverse   | CCTTGGTCTTCAGCTCACTCA      |
| <i>Slc27a1</i> | b        | Forward   | GGACGTGGCTGTGTATGG         |
|                |          | Reverse   | GCAGAAGACGCAGGAAGA         |
| <i>Aup1</i>    | b        | Forward   | CTCTGTGACGGTGTGATGTC       |
|                |          | Reverse   | TGGGATGAAGCCACCTTACT       |
| <i>Cebpa</i>   | b        | Forward   | GTGGACAAGAACAGCAACGA       |
|                |          | Reverse   | TCACTGGTCAACTCCAGCAC       |
| <i>Crisp</i>   | b        | Forward   | GTTGCATGTGGAGTTGCTGAAT     |
|                |          | Reverse   | CTTCCTTGATAATTGCCAACAG     |
| <i>Got2</i>    | b        | Forward   | CAGATCGGCATGTTCTGTTTC      |
|                |          | Reverse   | ACCGGATCTATTCACCACCAC      |
| <i>Slc27a4</i> | b        | Forward   | GCAGATGTGGCAGTTTATGG       |
|                |          | Reverse   | CAAGAAGCGCAGGAAGATG        |
| <i>Hadha</i>   | c        | Forward   | ACGCCCTTGACCACAGGTTTCGG    |
|                |          | Reverse   | TTGCGACCTAAGAAGCCCTTGGAG   |
| <i>Acox1</i>   | c        | Forward   | GCGCCGTCGAGAAATCGAGAAC     |
|                |          | Reverse   | TCAGGGTCTGCGATGCCAAATTC    |
| <i>Cpt1b</i>   | c        | Forward   | TTTGGTCCCCTGGCGGATGATG     |
|                |          | Reverse   | TCCAACAGTGCTTGGCGGATGTG    |
| <i>Adadm</i>   | c        | Forward   | AACTAAACATGGGCCAGCGATGC    |
|                |          | Reverse   | AGCTGCGACTGTAGGTCTGGTTC    |
| <i>Gys1</i>    | c        | Forward   | GCTGATGTGTTCCCTGGAGGCATTGG |
|                |          | Reverse   | TTGGCTGTGTCCCATAGTTGTTTGC  |
| <i>Pygm</i>    | c        | Forward   | ACAAGCGGCAGCTCCTCAACTG     |
|                |          | Reverse   | GGTGCAGCCTTGCCTCCAATC      |
| <i>HK2</i>     | c        | Forward   | CCTGGACCAGAGCATCCTCCTCAA   |
|                |          | Reverse   | ATTTACCACGGCCACCACATCCA    |
| <i>Pfkfb3</i>  | c        | Forward   | TCGATGCTGGTGTGTGTGAGGAAC   |
|                |          | Reverse   | AGGCGTTGGACAAGATCCTGGTAG   |
| <i>Slc2a4</i>  | c        | Forward   | ATGGCTGTCGCTGGTTTCTCCAA    |
|                |          | Reverse   | AAGGACCCATAGCATCCGCAACA    |
| <i>Ppp2r2b</i> | c        | Forward   | ATGGAATGGGTCAGACAGCGTCATC  |
|                |          | Reverse   | TGGTGTTCGGTCGAACATCCTGAAG  |
| <i>Ppp2r3a</i> | c        | Forward   | ATACCCACCCTGGCCTCACCTTC    |
|                |          | Reverse   | TCTGAACAACCGTGGTGATGTAGCG  |
| <i>Trib3</i>   | c        | Forward   | GCTCTCCGGCAGATGGCTAGTG     |
|                |          | Reverse   | ACCAGCTTCGTCCTCTCACAGTTG   |

Protocol a: 50°C for 30 min, 95°C for 5 min, 40 cycles of 95°C for 10 seconds and 55°C for 30 seconds.

Protocol b: 95°C for 10 min, 40 cycles of 95°C for 9 seconds, 60°C for 18 seconds and 72°C for 18 seconds.

Protocol c: 95°C for 10 min, 40 cycles of 95°C for 15 seconds, 60°C for 60 seconds.

**Supplemental Table 3:**

Effect of myocyte differentiation on PPAR $\gamma$  induced fatty acid uptake. C2C12 myocytes were studied at varying degrees of differentiation. Uptake of 80  $\mu$ M oleate with 40  $\mu$ M albumin was measured after a 30 minute incubation in cells having received the indicated treatments. N=3 for all groups.

| group                 | myotube content            |             |                          |
|-----------------------|----------------------------|-------------|--------------------------|
|                       | 10%                        | 50%         | 80%                      |
|                       | relative oleate uptake (%) |             |                          |
| adGFP                 | 100 $\pm$ 11               | 100 $\pm$ 2 | 100 $\pm$ 1              |
| adGFP+rosi            | 93 $\pm$ 1                 | 91 $\pm$ 1  | 94 $\pm$ 7               |
| adPPAR $\gamma$       | 74 $\pm$ 6 <sup>a</sup>    | 100 $\pm$ 7 | 112 $\pm$ 4              |
| adPPAR $\gamma$ +rosi | 63 $\pm$ 1 <sup>a,b</sup>  | 109 $\pm$ 1 | 124 $\pm$ 7 <sup>b</sup> |

<sup>a</sup> p<0.05 versus adGFP

<sup>b</sup> p<0.05 versus adGFP + rosi

## Supplementary Methods

*PPAR $\gamma$  Ligand Detection* Plasmids pFA-CMV and pFR-SEAP were from Stratagene (La Jolla, CA). pFA-PPAR $\gamma$ -LBD was created by ligating the cDNA encoding the ligand binding domain (Cys163 - Tyr475) of PPAR $\gamma$ 1 into pFA-CMV. Media from myotubes transfected with pFA-PPAR $\gamma$ -LBD and pFR-SEAP were assayed using with CSPD® Substrate (Applied Biosystems; Foster City, CA).

*Identification of Adipocyte-Selective Expression Markers* Transcripts of interest were identified from public microarray datasets: Diabetes Genome Anatomy Project (<http://www.diabetesgenome.org/>) samples jos2250,2347,2433 and jos2456,2470,2471 representing skeletal muscle and white adipose tissue from 6 week old C57Bl/6 mice respectively; Gene Expression Omnibus ([www.ncbi.nlm.nih.gov/geo/](http://www.ncbi.nlm.nih.gov/geo/)) dataset GDS734 samples GSM24459,60,61 and GSM24464,65,66 representing mature 3T3-L1 adipocytes under control conditions or treated for 1 day with 1  $\mu$ M rosiglitazone. AUP1 was the transcript most highly regulated by thiazolidinediones in mature adipocytes, as determined by absolute t-statistic, among genes with adipose expression in the top quartile and with the difference in muscle and adipose tissue expression in the lowest quartile. CRISP1 exhibited the highest absolute increase in expression between adipose tissue and muscle among genes with the lowest quartile of thiazolidinedione responsiveness and highest quartile of adipose expression.

**Supplementary References**

1. **Hu E, Tontonoz P, Spiegelman BM** 1995 Transdifferentiation of myoblasts by the adipogenic transcription factors ppar gamma and c/ebp alpha.. Proc Natl Acad Sci U S A 92:9856-9860
2. **Kausch C, Krützfeldt J, Witke A, Rettig A, Bachmann O, Rett K, Matthaei S, Machicao F, Häring HU, Stumvoll M** 2001 Effects of troglitazone on cellular differentiation, insulin signaling, and glucose metabolism in cultured human skeletal muscle cells.. Biochem Biophys Res Commun 280:664-674
3. **Singh J, Verma NK, Kansagra SM, Kate BN, Dey CS** 2007 Altered ppargamma expression inhibits myogenic differentiation in c2c12 skeletal muscle cells.. Mol Cell Biochem 294:163-171
4. **Schmitz-Peiffer C, Craig DL, Biden TJ** 1999 Ceramide generation is sufficient to account for the inhibition of the insulin-stimulated pkb pathway in c2c12 skeletal muscle cells pretreated with palmitate.. J Biol Chem 274:24202-24210
